# Supplementary material
Source: Springer Nature journal article supplement (https://www.springermedizin.de/resource/supplementary/12891_2004_90_MOESM1_ESM.pdf/9510460)

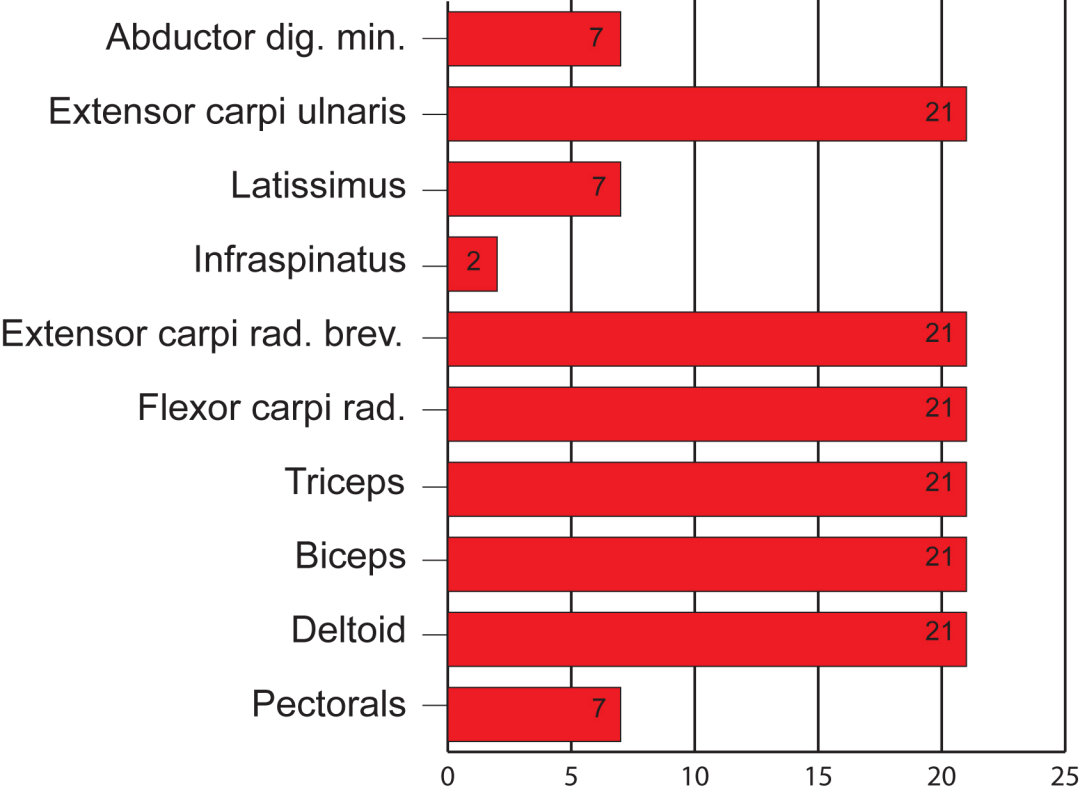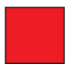

Number of patients with reduced strength

Supplement: MOESM1 [file 9510460]
